# Supplementary material for: Wound Healing Metabolites from Peters’ Elephant-Nose Fish Oil: An In Vivo Investigation Supported by In Vitro and In Silico Studies
Source: Mar Drugs. 2021 Oct 26;19(11):605. doi: 10.3390/md19110605 (PMC8625051; doi:10.3390/md19110605)
Supplement: Supplementary file 1 [file marinedrugs-19-00605-s001.zip › marinedrugs-1416811-supplementary.pdf]

## **SUPPLEMENTARY DATA**

### **Wound Healing Metabolites from Peters' Elephant-Nose Fish Oil: an *in vivo***

#### **Investigation Supported by *in vitro* and *in silico* Studies**

**Faisal Alsenani, Ahmed M. Ashour, Mubarak A. Alzubaidi, Ahmed F. Azmy, Mona H. Hetta, Dalia H. Abu-Baih, Mahmoud A. Elrehany, Ahmed Zayed\*, Ahmed M. Sayed, Usama Ramadan Abdelmohsen\*, Abeer H. Elmaidomy**

## List of Contents

- Figure S1.** GC/MS spectrum for Peters' elephant-nose fish oil
- Figure S2.**  $^1\text{H}$  NMR spectrum of compound **1** measured in  $\text{DMSO-}d_6$  at 400 MHz
- Figure S3.** DEPT-Q NMR spectrum of compound **1** measured in  $\text{DMSO-}d_6$  at 100 MHz
- Figure S4.**  $^1\text{H}$  NMR spectrum of compound **2** measured in  $\text{DMSO-}d_6$  at 400 MHz
- Figure S5.** DEPT-Q NMR spectrum of compound **2** measured in  $\text{DMSO-}d_6$  at 100 MHz
- Figure S6.**  $^1\text{H}$  NMR spectrum of compound **3** measured in  $\text{CDCl}_3$  at 400 MHz
- Figure S7.** DEPT-Q NMR spectrum of compound **3** measured in  $\text{CDCl}_3$  at 100 MHz
- Figure S8.**  $^1\text{H}$  NMR spectrum of compound **4** measured in  $\text{DMSO-}d_6$  at 400 MHz
- Figure S9.** DEPT-Q NMR spectrum of compound **4** measured in  $\text{DMSO-}d_6$  at 100 MHz
- Figure S10.**  $^1\text{H}$  NMR spectrum of compound **5** measured in  $\text{CDCl}_3$  at 400 MHz
- Figure S11.** DEPT-Q NMR spectrum of compound **5** measured in  $\text{CDCl}_3$  at 100 MHz
- Figure S12.**  $^1\text{H}$  NMR spectrum of compound **6** measured in  $\text{CDCl}_3$  at 400 MHz
- Figure S13.** DEPT-Q NMR spectrum of compound **6** measured in  $\text{CDCl}_3$  at 100 MHz

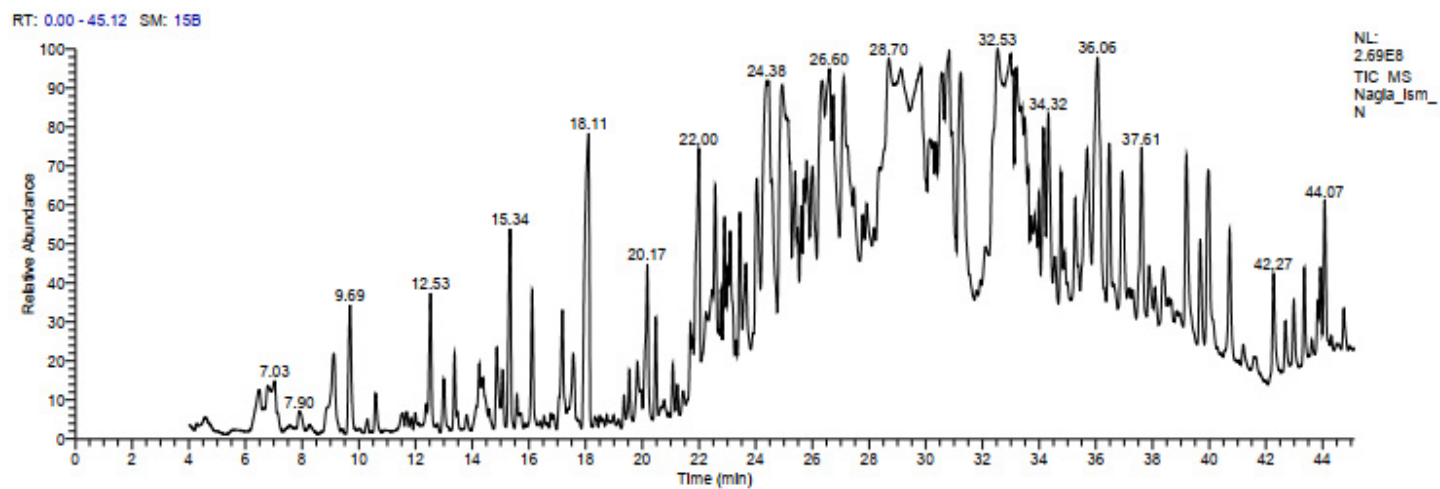

**Figure S1.** GC/MS spectrum for Peters' elephant-nose fish oil

Sep14-2020-abeer  
ABEER-COMP A  
PROTON\_BSU DMSO {C:\data\} abeer 19

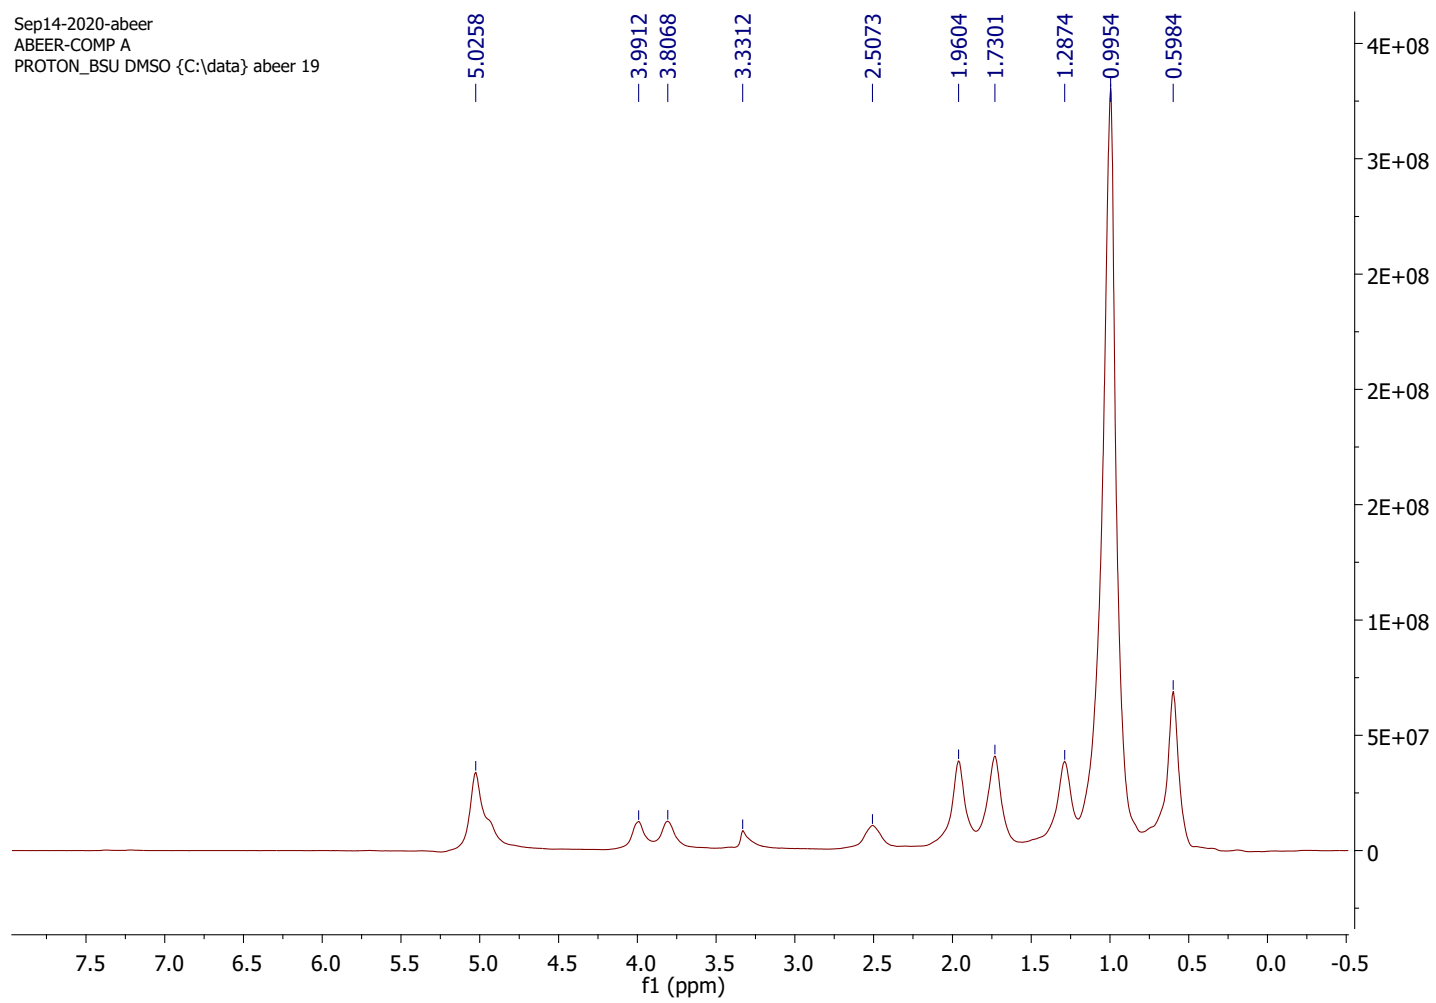

**Figure S2.**  $^1\text{H}$  NMR spectrum of compound **1** measured in  $\text{DMSO}-d_6$  at 400 MHz

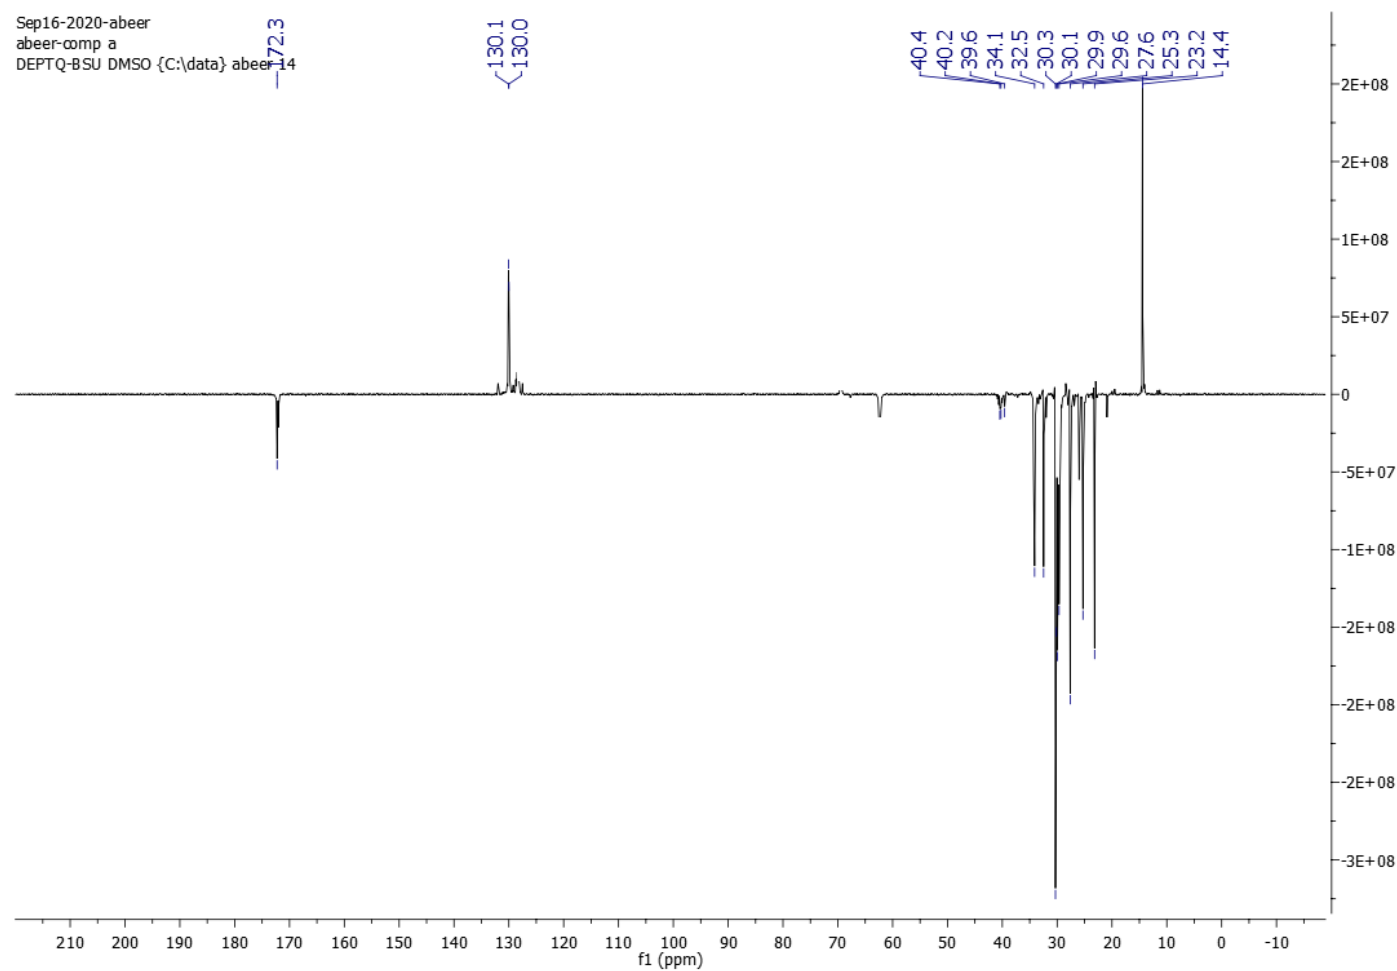

**Figure S3.** DEPT-Q NMR spectrum of compound **1** measured in DMSO- $d_6$  at 100 MHz

Sep14-2020-abeer  
ABEER A-COMP C  
PROTON\_BSU DMSO {C:\data} abeer 18

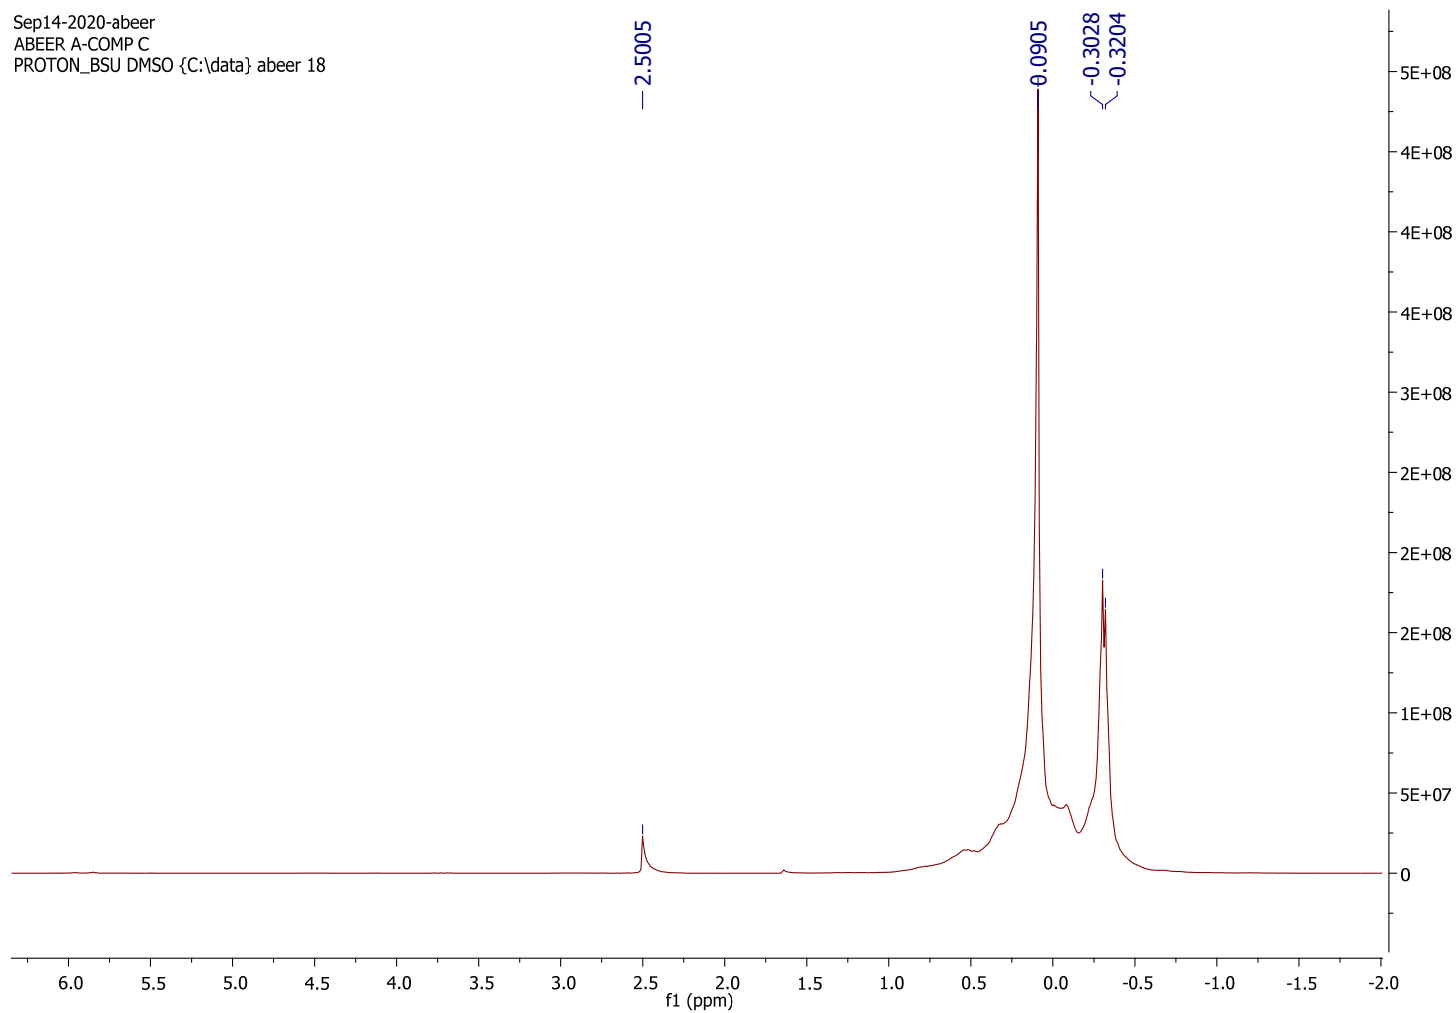

**Figure S4.**  $^1\text{H}$  NMR spectrum of compound **2** measured in  $\text{DMSO}-d_6$  at 400 MHz

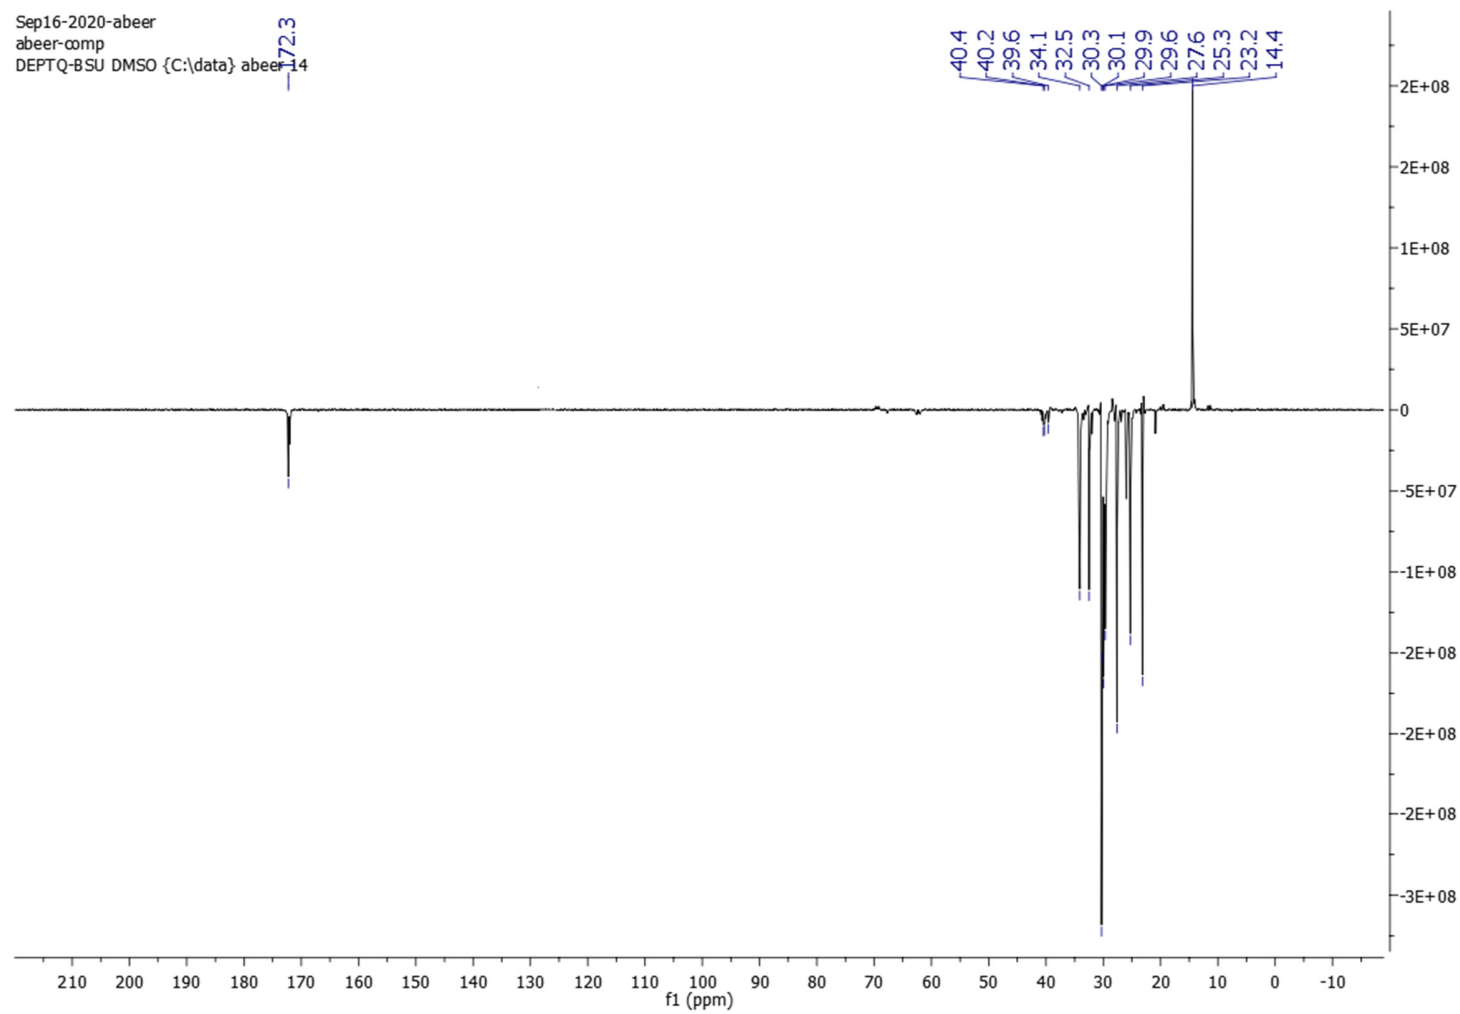

**Figure S5.** DEPT-Q NMR spectrum of compound **2** measured in DMSO- $d_6$  at 100 MHz

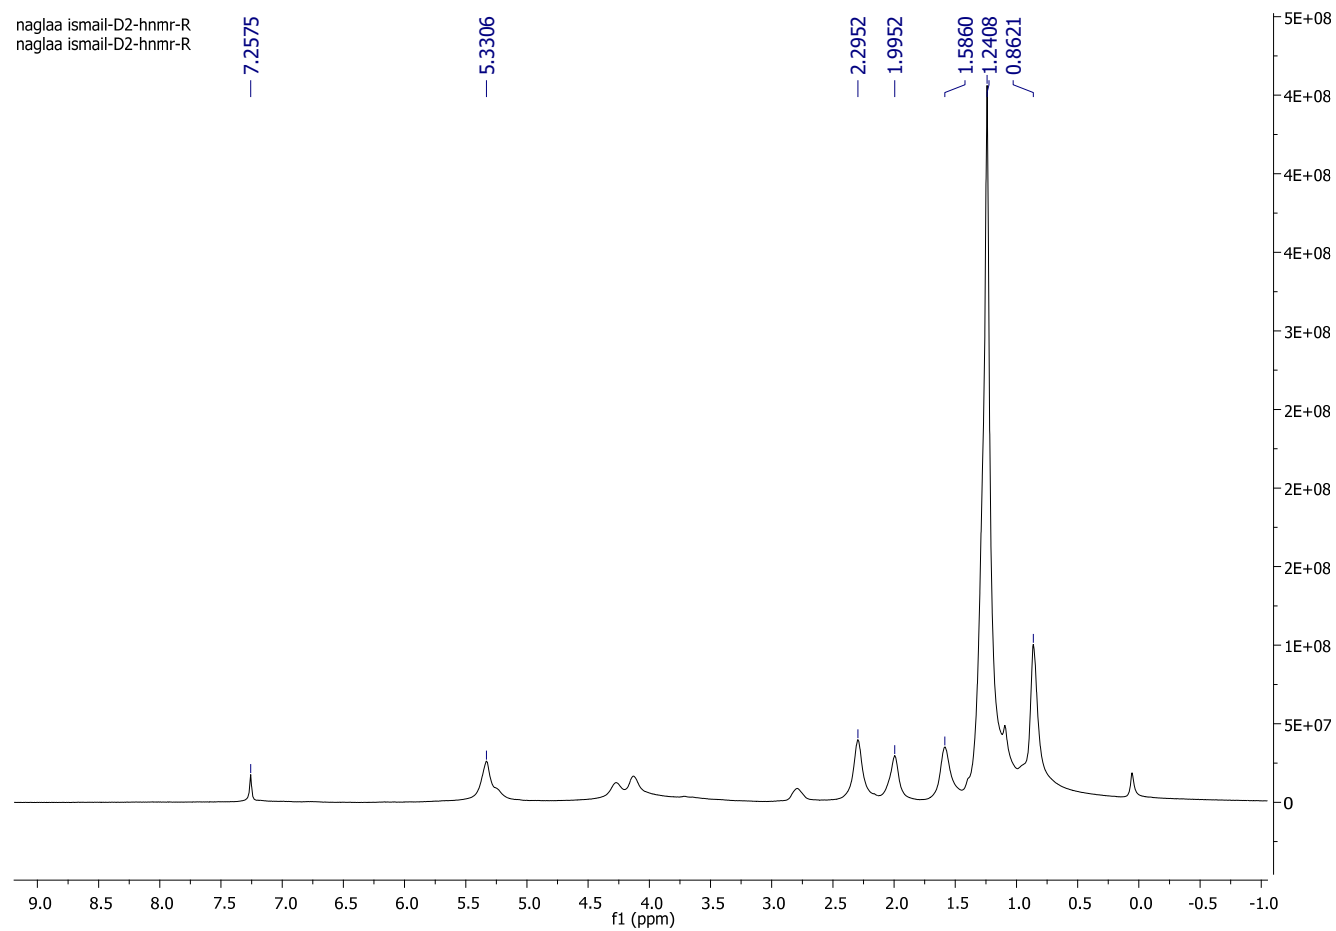

**Figure S6.**  $^1\text{H}$  NMR spectrum of compound **3** measured in  $\text{CDCl}_3$  at 400 MHz

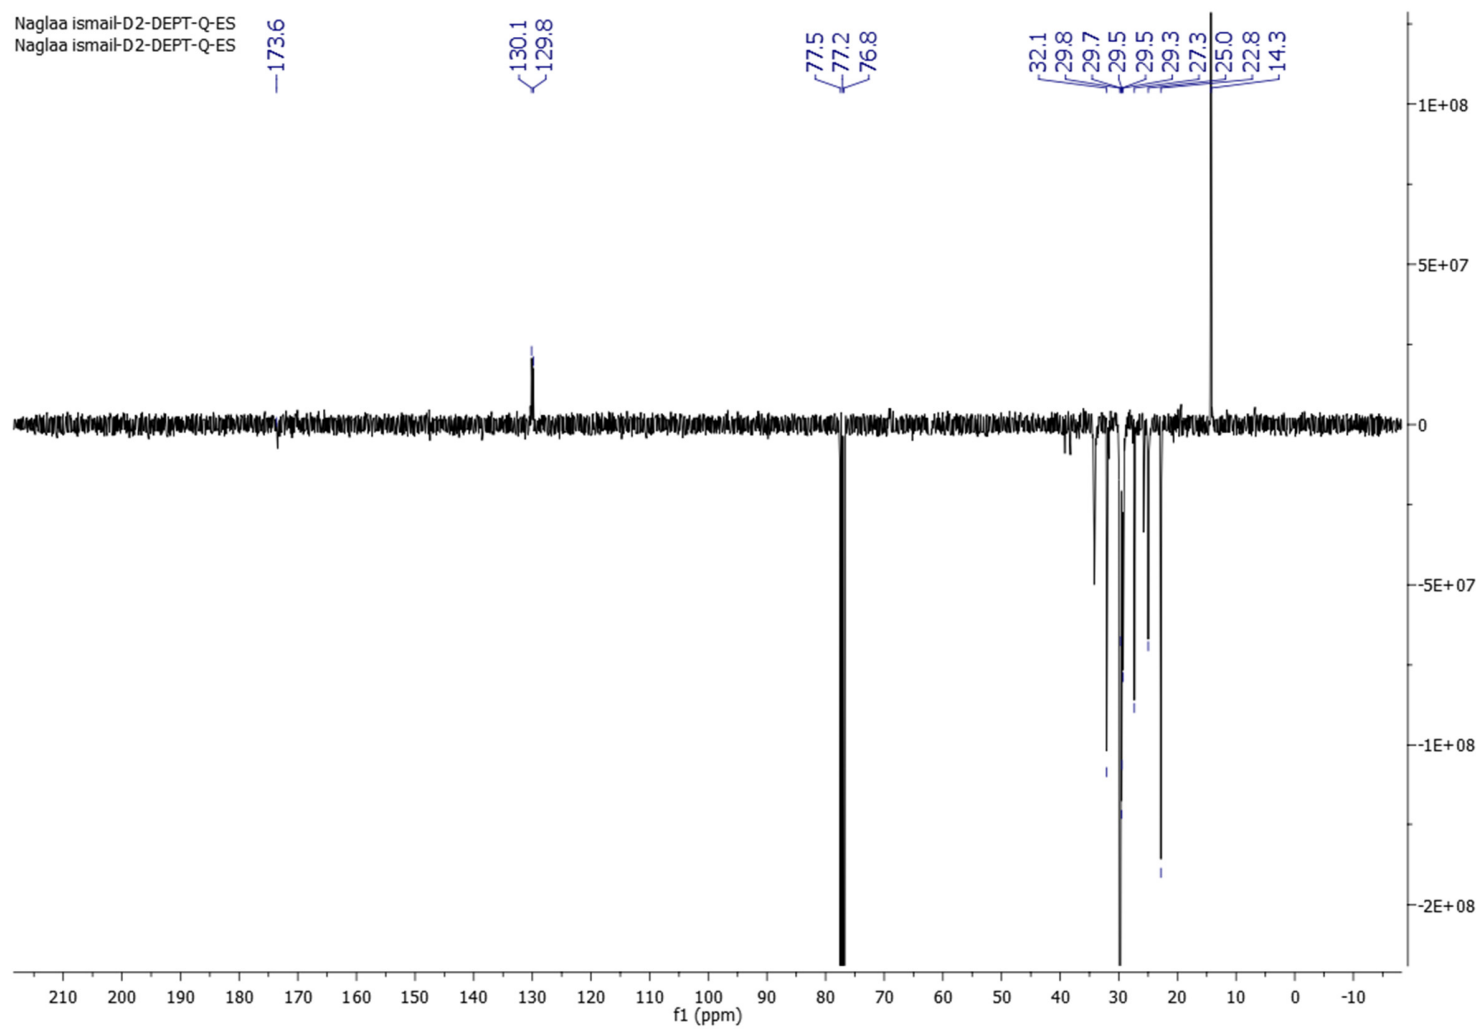

**Figure S7.** DEPT-Q NMR spectrum of compound **3** measured in  $\text{CDCl}_3$  at 100 MHz

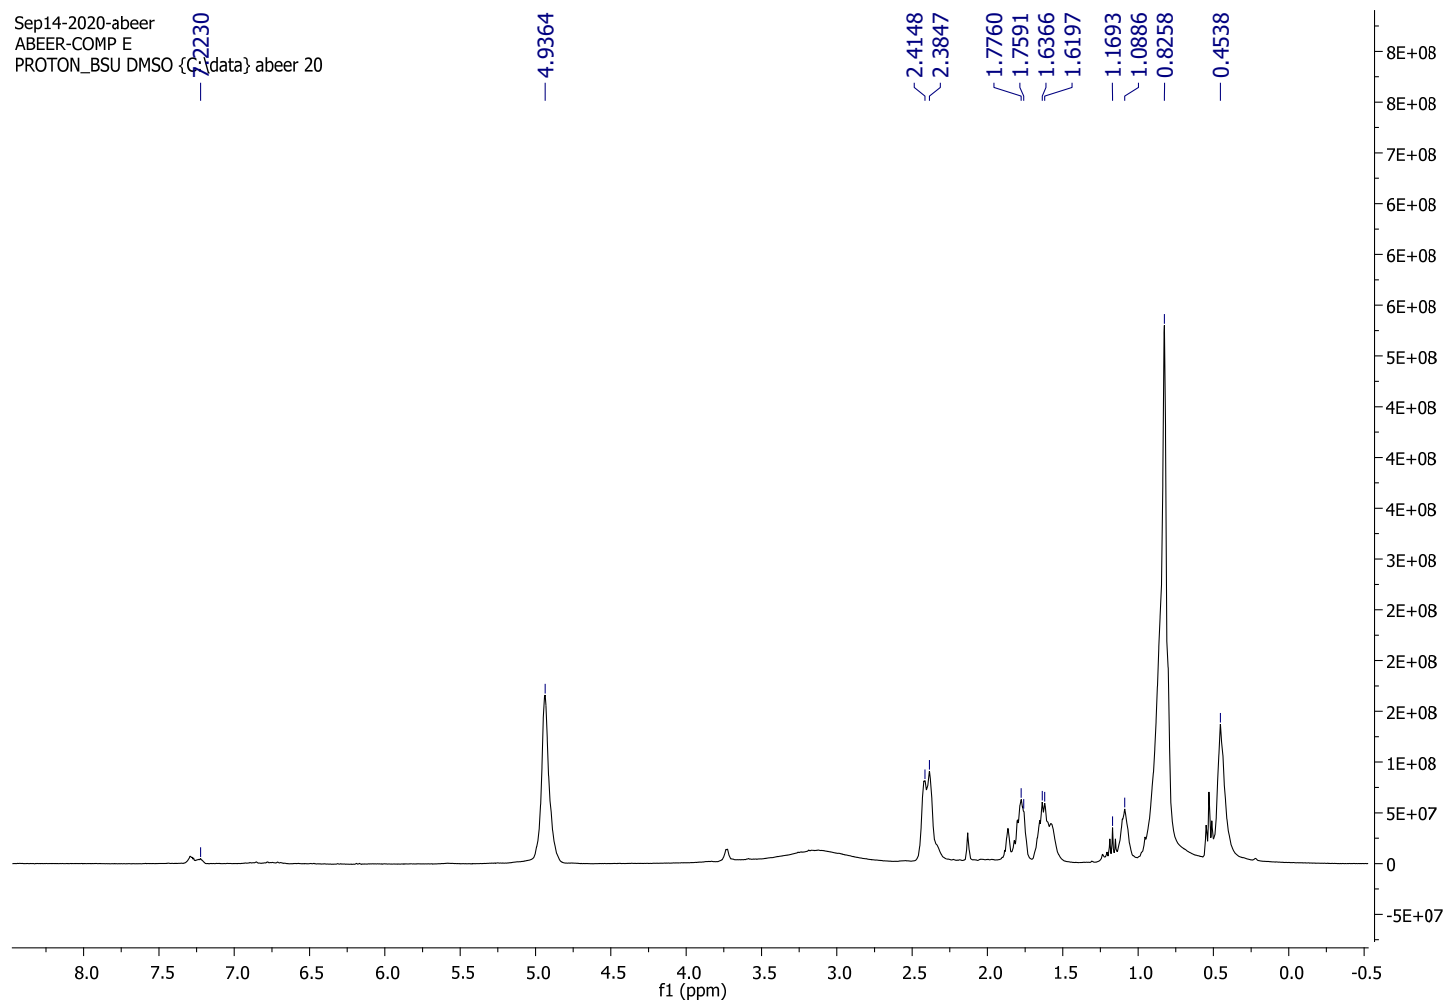

**Figure S8.**  $^1\text{H}$  NMR spectrum of compound **4** measured in  $\text{DMSO-}d_6$  at 400 MHz

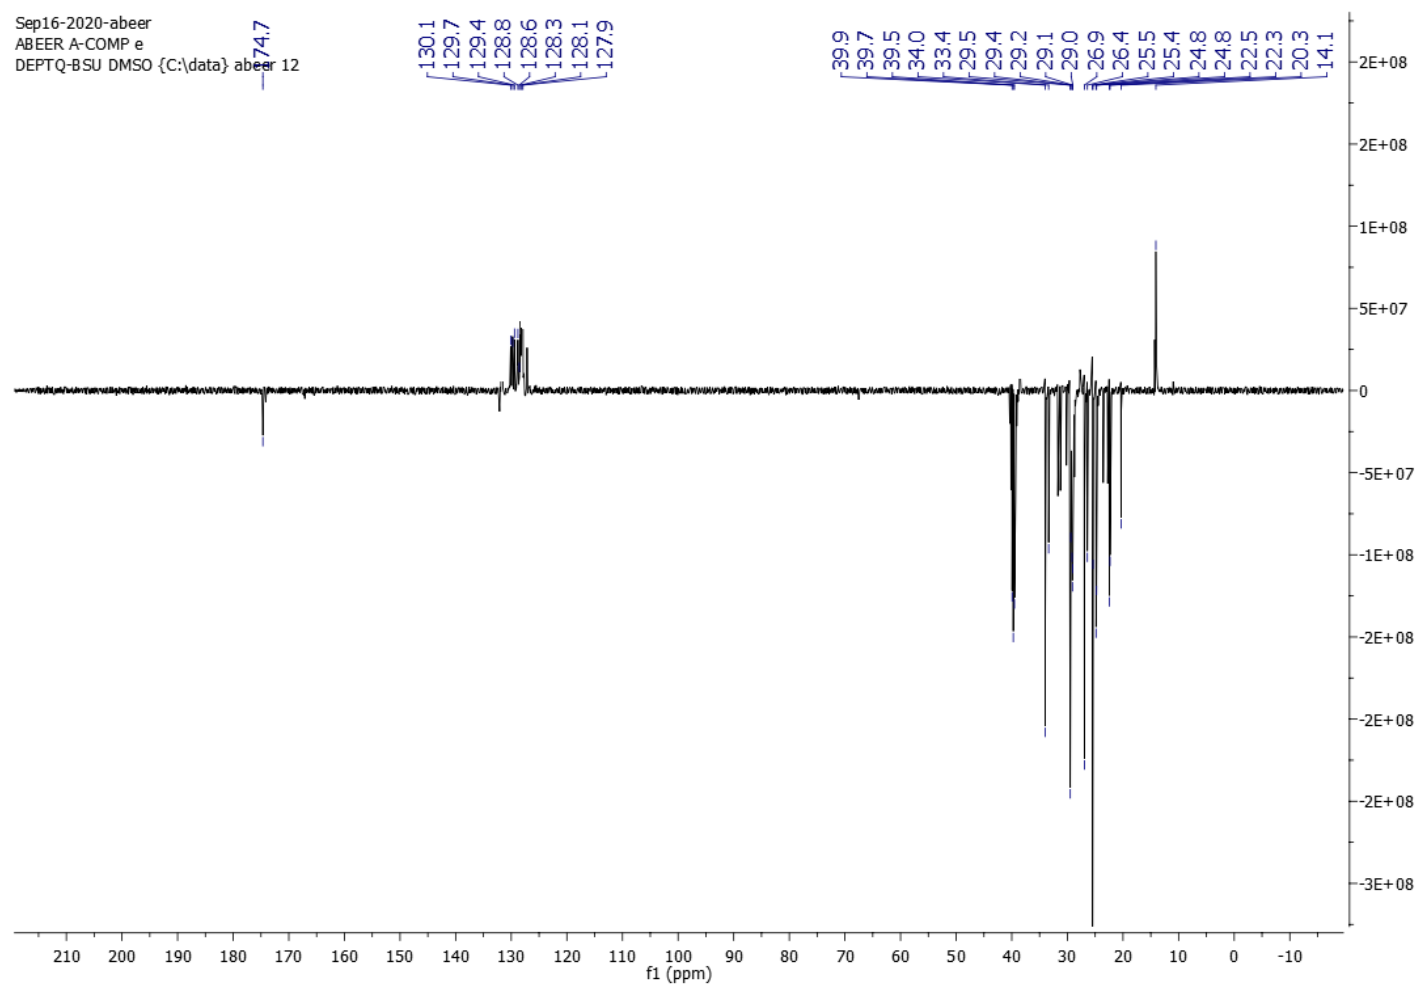

**Figure S9.** DEPT-Q NMR spectrum of compound **4** measured in DMSO- $d_6$  at 100 MHz

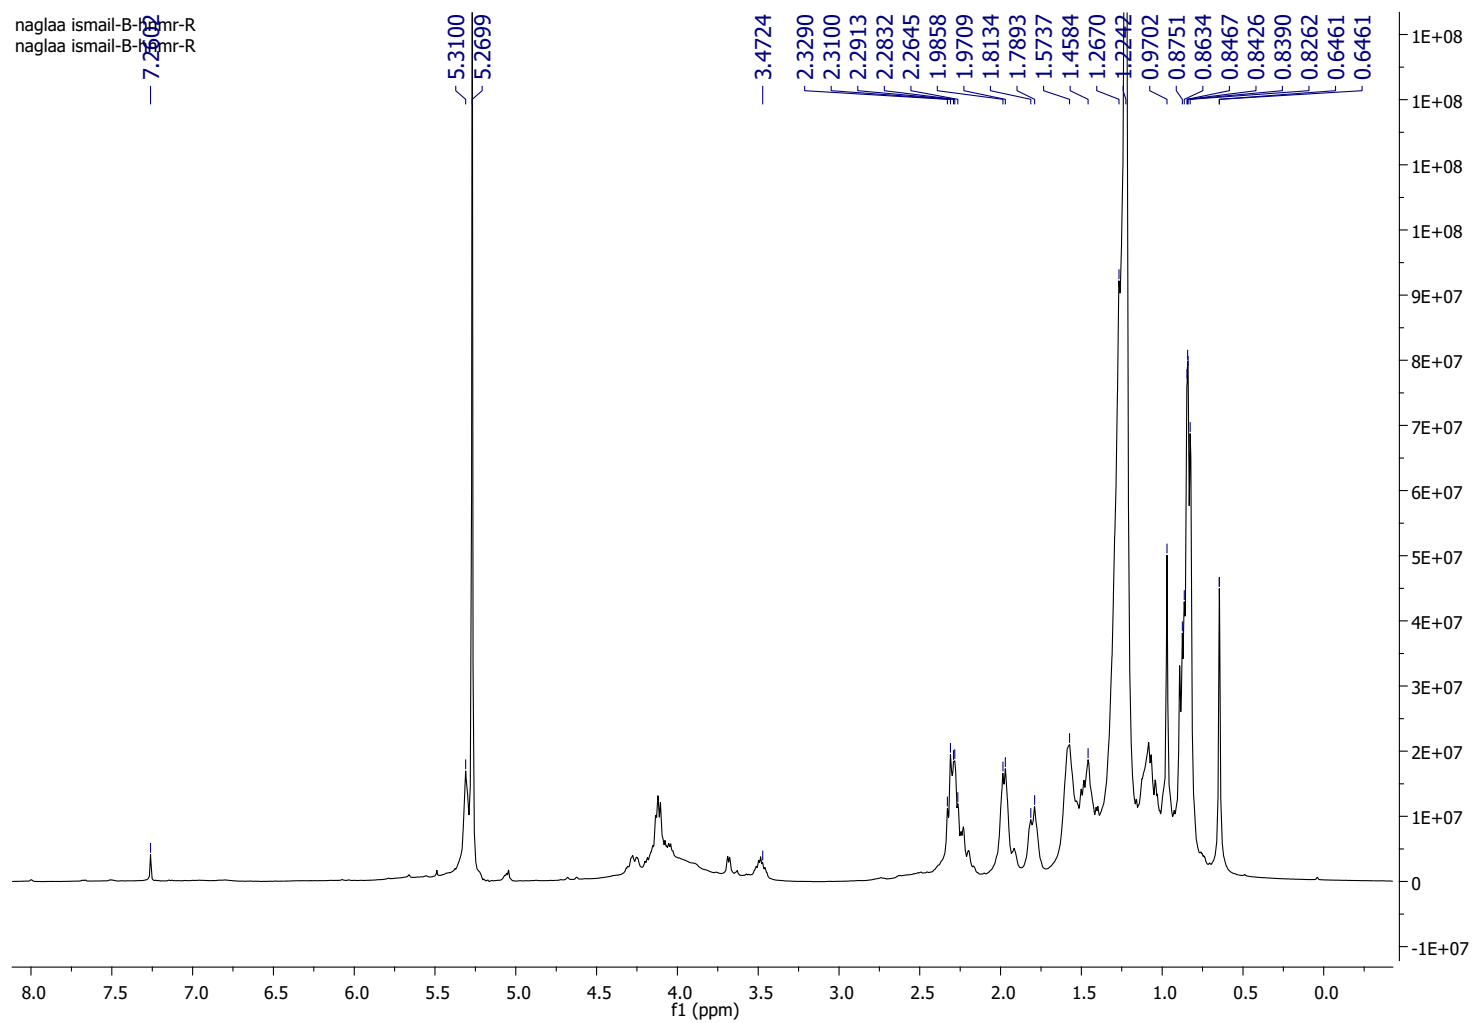

**Figure S10.**  $^1\text{H}$  NMR spectrum of compound **5** measured in  $\text{CDCl}_3$  at 400 MHz

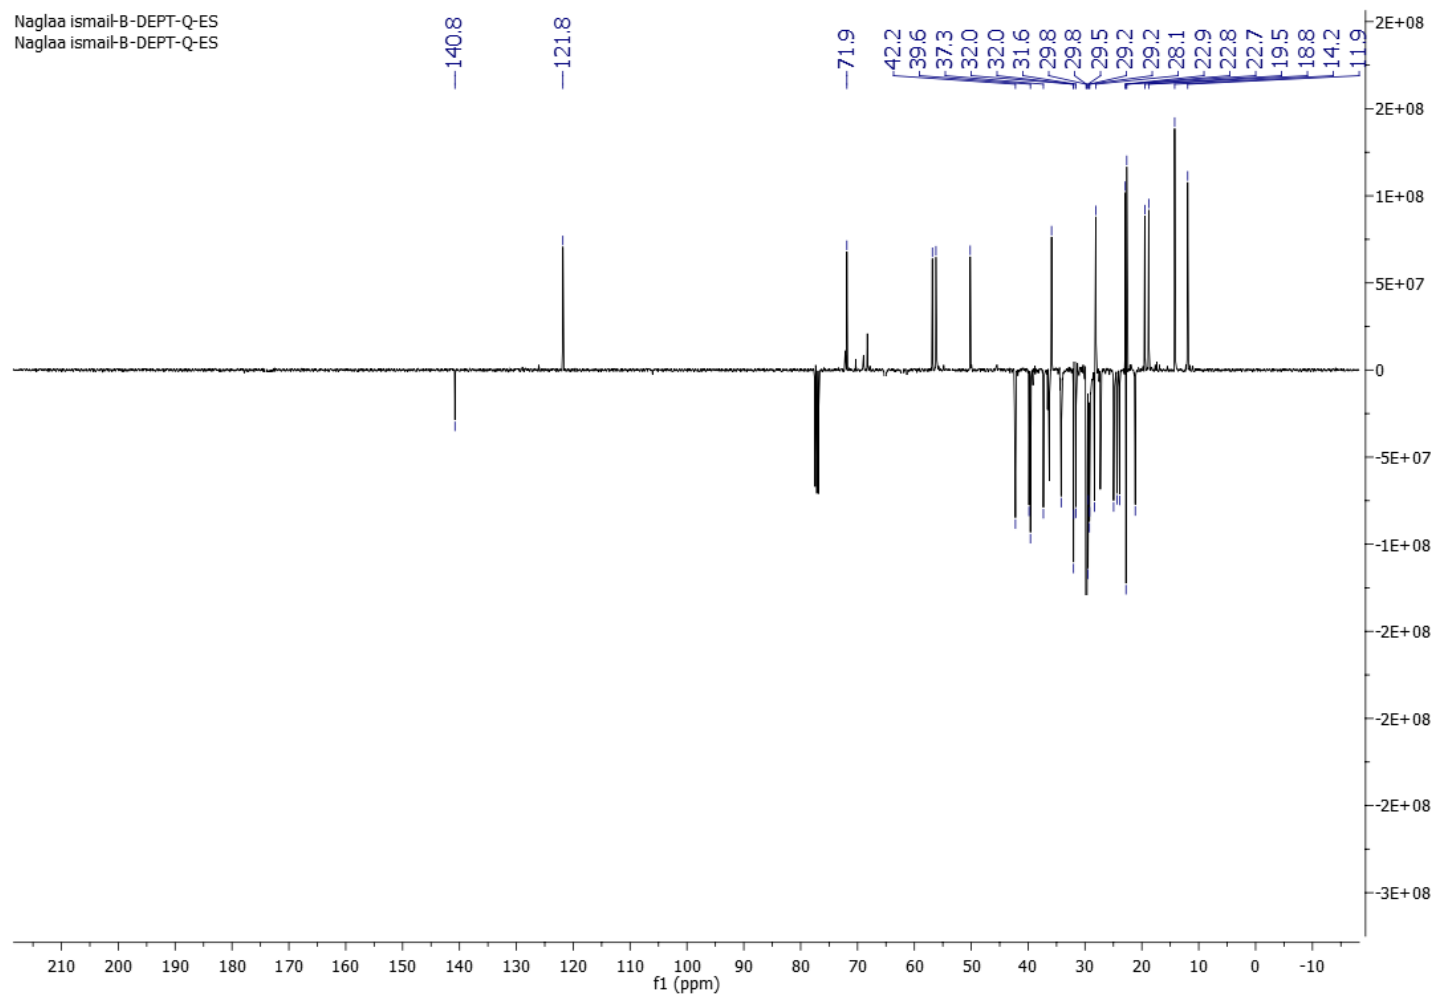

**Figure S11.** DEPT-Q NMR spectrum of compound **5** measured in  $\text{CDCl}_3$  at 100 MHz

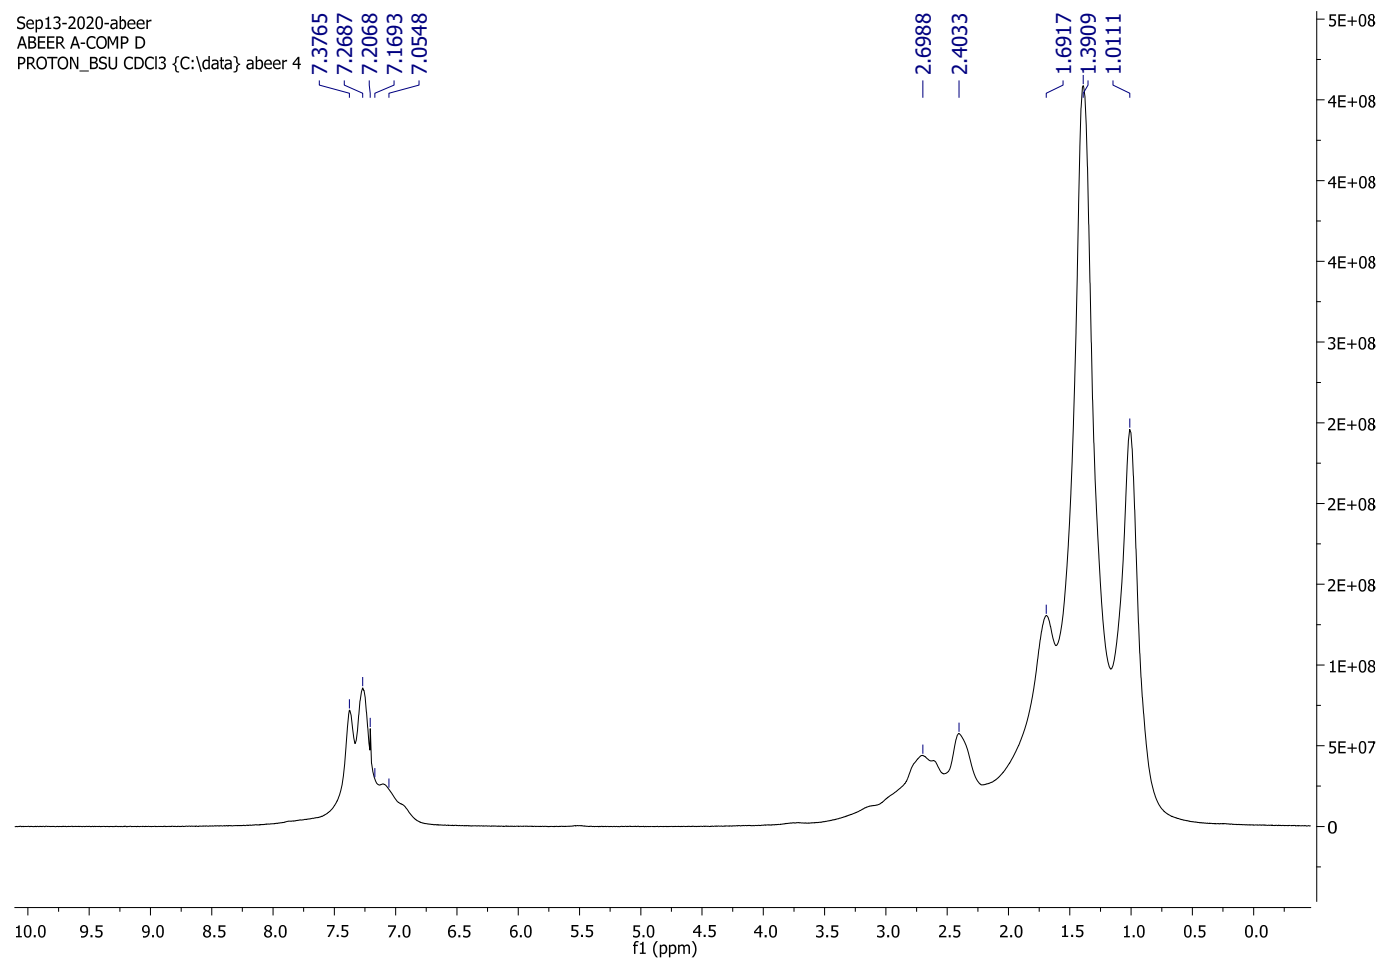

**Figure S12.** <sup>1</sup>H NMR spectrum of compound **6** measured in CDCl<sub>3</sub> at 400 MHz

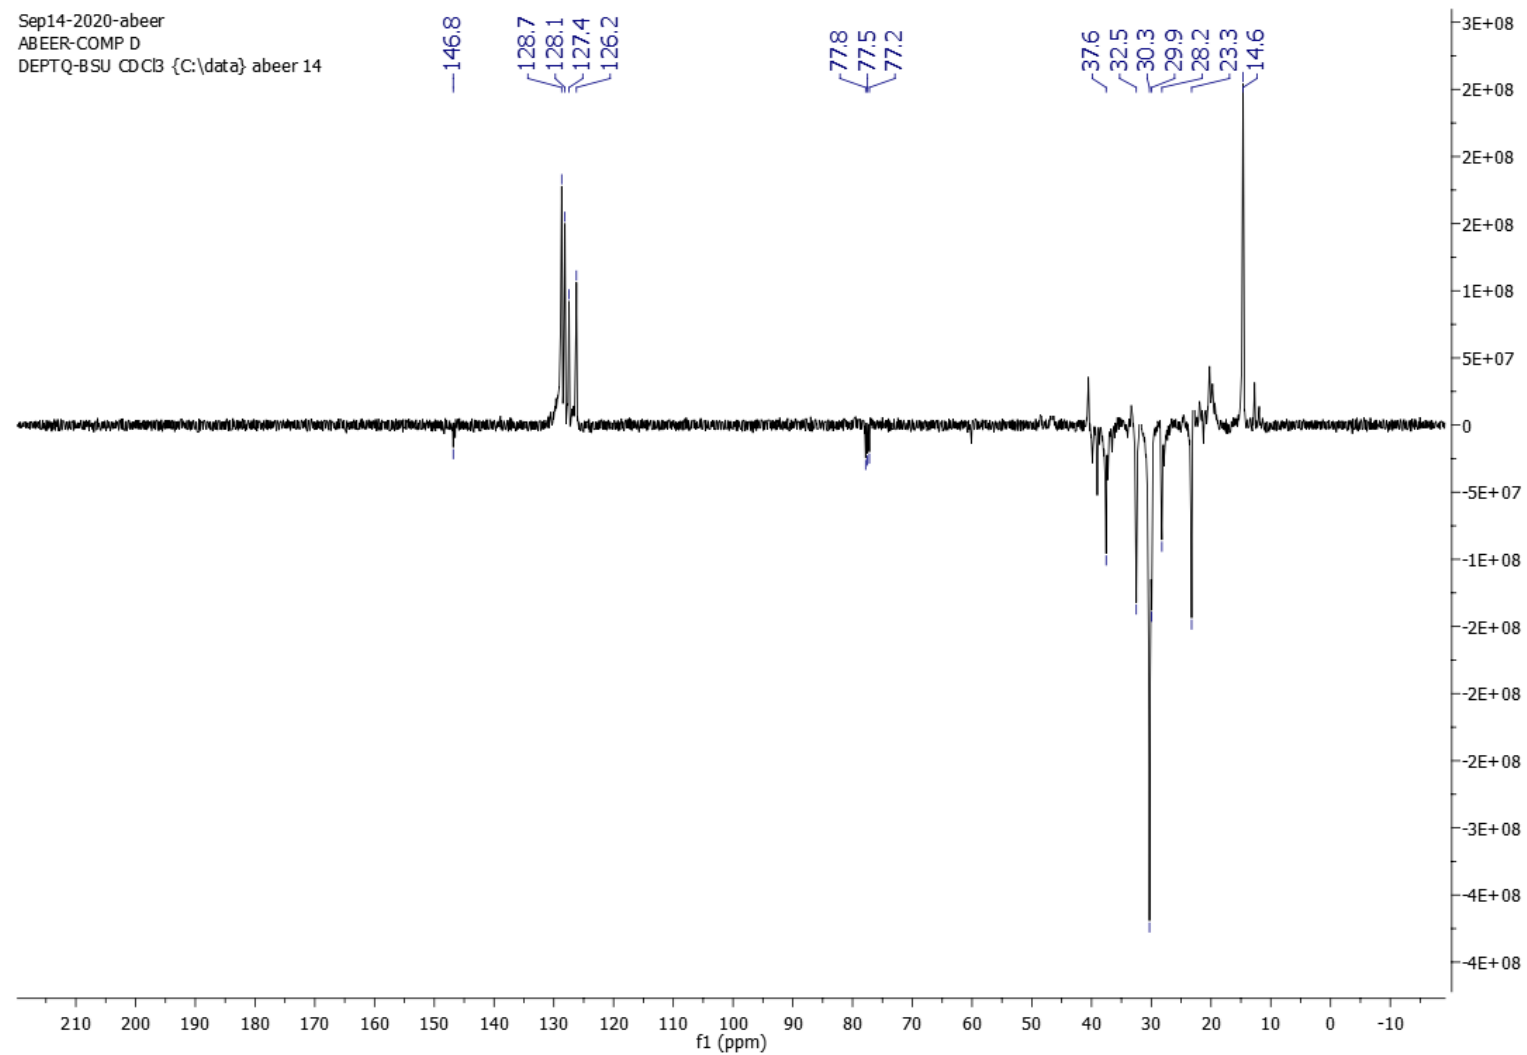

**Figure S13.** DEPT-Q NMR spectrum of compound **6** measured in CDCl<sub>3</sub> at 100 MHz
